# Supplementary material for: Conserved Mechanism of Bicarbonate-Induced Sensitization of CatSper Channels in Human and Mouse Sperm
Source: PubMed Central journal article supplement (PMC8505895; doi:10.3389/fcell.2021.733653), 2021-09-28
Supplement: Data_Sheet_1.pdf [file Data_Sheet_1.pdf]

## Supplementary Figures

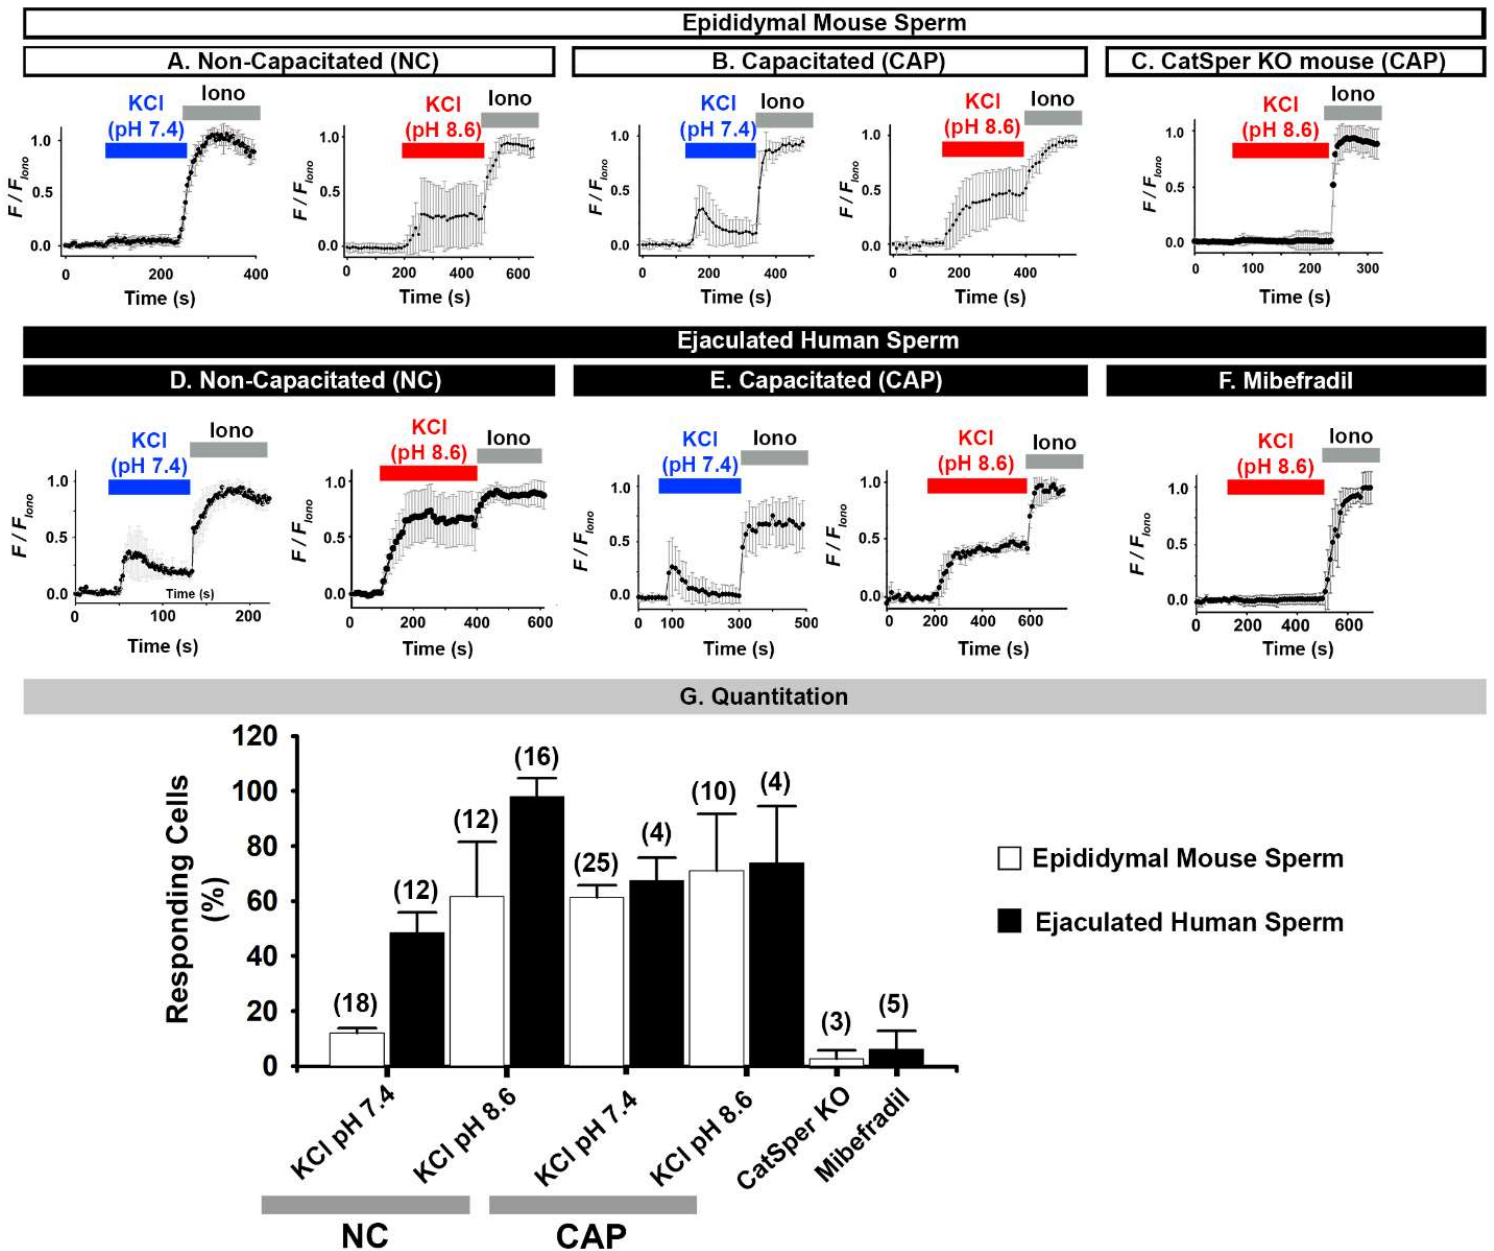

**Supplementary Figure 1. Intracellular  $\text{Ca}^{2+}$  responses to neutral and alkaline depolarization in mouse epididymal and human ejaculated sperm.** (A-F) Representative traces of mean  $\text{Ca}^{2+}$  responses to 50 mM KCl pH 7.4 (Blue) or pH 8.6 (Red) in (A) non-capacitated epididymal mouse sperm, (B) capacitated epididymal mouse sperm, (C) capacitated epididymal sperm from CatSper KO mouse, (D) non-capacitated ejaculated human sperm, (E) capacitated ejaculated human sperm, and (F) ejaculated human sperm after inhibiting CatSper channels with 20  $\mu\text{M}$  Mibefradil. (G). Graph of the mean and standard deviation of the percentage of sperm showing increased  $[\text{Ca}^{2+}]_i$ . Iono = 5 mM Ionomycin. Numbers in parentheses are numbers of independent mouse or human samples.

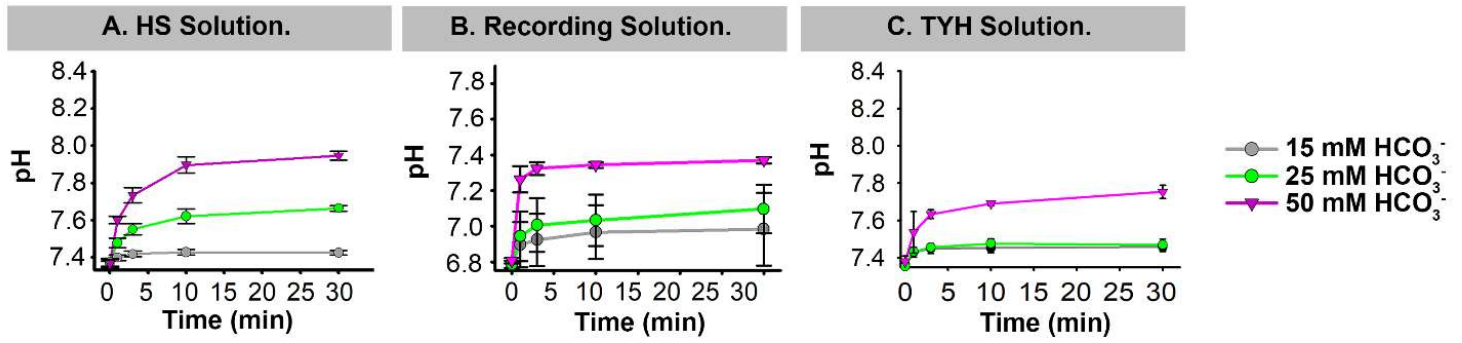

**Supplementary Figure 2. Low concentration of HCO<sub>3</sub><sup>-</sup> has minimal effect on pH of recording solutions.** Mean and standard deviation of pH over time in **(A)** HS solution, in which mouse sperm were recorded, **(B)** Recording solution, in which human sperm were recorded, and **(C)** TYH solution, in which intracellular pH from mouse sperm were recorded.
